# Supplementary material
Source: PubMed Central journal article supplement (PMC4200430)

**A**

**EXONS 5-15**

C-

II-1

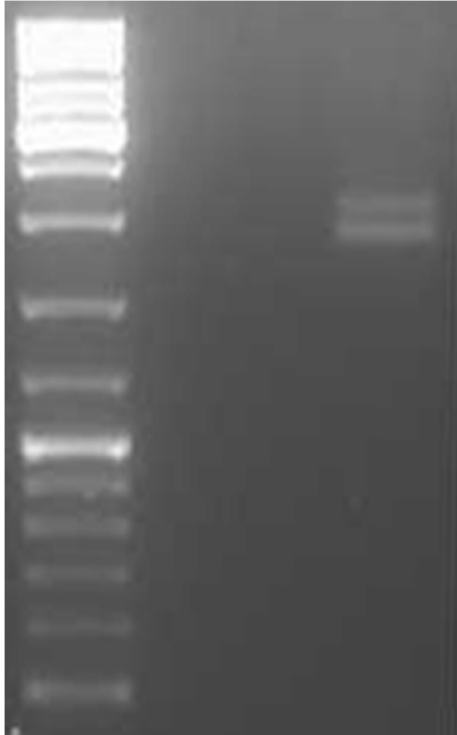

FullTr (2079 bp)  
AltTr (1881 bp)

**B**

**EXONS 13-21**

II-1

C-

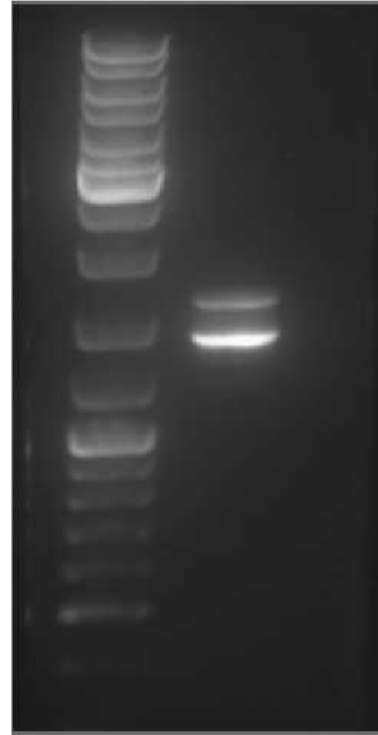

FullTr (1557 bp)  
AltTr (1359 bp)

Supplement: ejhg201418x2.pdf [file ejhg201418x2.pdf]
